# Supplementary material
Source: PubMed Central journal article supplement (PMC2735188)
Supplement: NIHMS96152-supplement-01.pdf [file NIHMS96152-supplement-01.pdf]

Singleton Deletions Throughout the Genome and One Common Duplication on Chr16p12.1 Increase Risk of Bipolar Disorder

**Supplementary Materials**

**Supplementary Table 1 Details of The Primers Used for qPCR**

| Primer ID* | Primer Sequence            | Singleton Region Locations |
|------------|----------------------------|----------------------------|
| 11950-1-F  | CAATGCTTATCCCAGTTGCTAGGT   | Chr15:43934925-44070720    |
| 11950-1-R  | AAAAAGCCCCCATGCA           | Chr15:43934925-44070720    |
| 11950-2-F  | TGTTCCGCTCGTCCTTGTC        | Chr15:43934925-44070720    |
| 11950-2-R  | TCTAATCCTGGCACTCCACCAT     | Chr15:43934925-44070720    |
| 11950-3-F  | CAGTTAGTGCCCTGCAGAGTGA     | Chr15:43934925-44070720    |
| 11950-3-R  | TTCAGAAGTCAAACAGCAGCTCTA   | Chr15:43934925-44070720    |
| 14684-1-F  | AGCAGCCATAAGTATCAACCAATG   | Chr13:104327533-104693653  |
| 14684-1-R  | TGCAGATGTAACCAGTGAGATGTG   | Chr13:104327533-104693653  |
| 14684-2-F  | AAGTGCCAGAGGCCAAGCT        | Chr13:104327533-104693653  |
| 14684-2-R  | CGGGTGGGAAGCAATGTG         | Chr13:104327533-104693653  |
| 14684-3-F  | TCCAGATCCATGCAATCTTGTT     | Chr13:104327533-104693653  |
| 14684-3-R  | AGTTAGGAGGCCTTGGTAATTTCT   | Chr13:104327533-104693653  |
| 19192-1-F  | AGCAAGACTCATGCAAATATGTTTCT | Chr8:89714774-89872504     |
| 19192-1-R  | GACACCACACCTTACCTAACATGT   | Chr8:89714774-89872504     |
| 19192-2-F  | GGAAAAGTACCAGCCCCTTGA      | Chr8:89714774-89872504     |
| 19192-2-R  | ACAGGGCTGGGAGGAGTCA        | Chr8:89714774-89872504     |
| 19192-3-F  | TCTCAACCAGACATAGGGACACA    | Chr8:89714774-89872504     |
| 19192-3-R  | CTGAGGCAATTTAGCTATCCA      | Chr8:89714774-89872504     |
| 27101-1-F  | CACACAGCAAGGCAGGCATA       | Chr3:65647659-65852131     |
| 27101-1-R  | TGAATGCTGCAGAACTTGATACC    | Chr3:65647659-65852131     |
| 27101-2-F  | AGCAAAGCTCTGCCTAAATAAATCTT | Chr3:65647659-65852131     |
| 27101-2-R  | GGAGAAGGACCATTACTGGACTTC   | Chr3:65647659-65852131     |
| 27101-3-F  | GAGTTTCTGGGCATGCTCAAG      | Chr3:65647659-65852131     |
| 27101-3-R  | GATCCATGGGCGATTTGAGT       | Chr3:65647659-65852131     |
| 28494-1-F  | GACTCAAATTCATCACCTGTGTT    | Chr22:32209002-32482148    |
| 28494-1-R  | CCAATC CGCTGTGTCTTCACT     | Chr22:32209002-32482148    |
| 28494-2-F  | CTCTACCGCTCCTC TTCCTATG    | Chr22:32209002-32482148    |
| 28494-2-R  | GGCCAGCATGGAGCCTAAC        | Chr22:32209002-32482148    |
| 28494-3-F  | TGATGCAAAACAACCAAGACTGT    | Chr22:32209002-32482148    |
| 28494-3-R  | GCTGCAAAGCCAGAGCAGTT       | Chr22:32209002-32482148    |
| 28823-1-F  | TGTCCATTTATCCCAGAAACATCA   | Chr10:90344868-90556337    |
| 28823-1-R  | AATGCGAGTAAGGAATCCTCATCT   | Chr10:90344868-90556337    |
| 28823-2-F  | CGTTCTGATAACAAGTGTGTTTGA   | Chr10:90344868-90556337    |
| 28823-2-R  | TTTTCATATTGGTTCAGACATGTC   | Chr10:90344868-90556337    |
| 28823-3-F  | GCAGCTGCTTACCGTGTCA        | Chr10:90344868-90556337    |

|           |                                 |                          |
|-----------|---------------------------------|--------------------------|
| 28823-3-R | TGACCTCAGCTGCTCCTTAATATG        | Chr10:90344868-90556337  |
| 39296-1-F | TGGCATATGGTATTCAATAAAGAGAGA     | Chr4:131746385-131852628 |
| 39296-1-R | TTCATAAAGCAAAGCTGCAAAAGT        | Chr4:131746385-131852628 |
| 39296-2-F | TCCCAAATGACATGTAATGCTTTAT       | Chr4:131746385-131852628 |
| 39296-2-R | CAATCTGTCTTCTAGTAGAAACGTAGTAAAA | Chr4:131746385-131852628 |
| 39296-3-F | TTTTATGCCTGAAAATATCGGATCT       | Chr4:131746385-131852628 |
| 39296-3-R | TTGCAAGAAGCCAGGATGTTT           | Chr4:131746385-131852628 |
| 40375-1-F | AGGTCTATTCAGGGAAGCTGGGATA       | Chr2:51052476-51182653   |
| 40375-1-R | CACTGACCCTTATGGAAGAATCTGT       | Chr2:51052476-51182653   |
| 40375-2-F | GCACCTGCTAGAAAGGCTTCA           | Chr2:51052476-51182653   |
| 40375-2-R | GTGCTGCCCTAGATTTAAAAACACT       | Chr2:51052476-51182653   |
| 40375-3-F | ACGGTGCCTTTGGTCTCCTA            | Chr2:51052476-51182653   |
| 40375-3-R | CAGCTTCTCGAAATACTGAAAATAGC      | Chr2:51052476-51182653   |
| 46078-1-F | TCAAACACT GTGTGTGTGATTTTCA      | Chr12:23795077-23945839  |
| 46078-1-R | TGTCGCTCTCTCCCCTCCTT            | Chr12:23795077-23945839  |
| 46078-2-F | GACAAGGTAGGCCAAAGGAAAAA         | Chr12:23795077-23945839  |
| 46078-2-R | AAGCCCTCTGTCTTCTAGGA            | Chr12:23795077-23945839  |
| 46078-3-F | TGTCTACTATTGAAAATAGGAGCAGGTT    | Chr12:23795077-23945839  |
| 46078-3-R | AAGGAGTATGGTGGCCCACTT           | Chr12:23795077-23945839  |
| 51472-1-F | GAAGTGGACCCTACCAGTTAGC          | Chr7:80252572-80393232   |
| 51472-1-R | CTACTAGGAAGCAGAGCTGAGCAA        | Chr7:80252572-80393232   |
| 51472-2-F | CCCCATCCTCCCCTTCTT              | Chr7:80252572-80393232   |
| 51472-2-R | CGTAGTGACTGGTCCCTCCATT          | Chr7:80252572-80393232   |
| 51472-3-F | GGGATGGGCCAGCAACTT              | Chr7:80252572-80393232   |
| 51472-3-R | GAGTAGAATTGCTAACATTCCAAAAATG    | Chr7:80252572-80393232   |
| 52883-1-F | GATTAGCCCCAACAGCTCTT            | Chr14:65606389-65762067  |
| 52883-1-R | TCGGTAATGTTTGCCAAACATC          | Chr14:65606389-65762067  |
| 52883-2-F | AACATTGACTCAGTTCGTCTCTGTCT      | Chr14:65606389-65762067  |
| 52883-2-R | GAGGCTGGCATGGATTGTG             | Chr14:65606389-65762067  |
| 52883-3-F | ATTCACAACAATCCACACAATGC         | Chr14:65606389-65762067  |
| 52883-3-R | AGCTGGCCTATTCTGCTTTC            | Chr14:65606389-65762067  |
| 54165-1-F | TGTTGAGCCATCACTAAAACCAA         | Chr1:100964950-101093664 |
| 54165-1-R | TGCCTGACACAGCCAAACC             | Chr1:100964950-101093664 |
| 54165-2-F | AGACTCCCACTGCCTCCATATG          | Chr1:100964950-101093664 |
| 54165-2-R | ATTCCTCCCTGCCCTCCTT             | Chr1:100964950-101093664 |
| 54165-3-F | TGCGGAGGGCCTTCTCA               | Chr1:100964950-101093664 |
| 54165-3-R | TGAGCTGCCACTGCTGTTTG            | Chr1:100964950-101093664 |
| 59985-1-F | TGGGAGCTTTGCCAACTGA             | Chr11:83857199-84048322  |
| 59985-1-R | GATGAGTCACAGCTTGAAAACC          | Chr11:83857199-84048322  |
| 59985-2-F | GCTCCCAGCTCCCTATACAC            | Chr11:83857199-84048322  |
| 59985-2-R | CTATGCCCTGAGAGCTGGAATG          | Chr11:83857199-84048322  |
| 59985-3-F | AAGGGTGGCAGGAGGGATT             | Chr11:83857199-84048322  |
| 59985-3-R | GCCCAATGTGCTGACAATTTT           | Chr11:83857199-84048322  |

|           |                               |                          |
|-----------|-------------------------------|--------------------------|
| 62878-1-F | CTCTGTTCTGAGTGCGTTGCTT        | Chr5:117432239-117538631 |
| 62878-1-R | GCCATATTGCGGTTGAACAGT         | Chr5:117432239-117538631 |
| 62878-2-F | CCAATGGCATCATCCTTTGAA         | Chr5:117432239-117538631 |
| 62878-2-R | GAATCAAGAAAG ATGTCGAATAAACTGA | Chr5:117432239-117538631 |
| 62878-3-F | AGATGAGTGAGCTGGAAAAGATGTG     | Chr5:117432239-117538631 |
| 62878-3-R | TTCTGTTTGCTTCTAACTTCAGCAA     | Chr5:117432239-117538631 |
| 67570-1-F | AAAGACCCAACCCCAACTC           | Chr1:30336050-30952188   |
| 67570-1-R | TGTGCACGTCCAGTCTGTGA          | Chr1:30336050-30952188   |
| 67570-2-F | TGGGCCCCACAGTCATTCT           | Chr1:30336050-30952188   |
| 67570-2-R | TTCGAATTCCAAACCTCAACCT        | Chr1:30336050-30952188   |
| 67570-3-F | GACAGCCCCAGGCAGGTT            | Chr1:30336050-30952188   |
| 67570-3-R | AGATGACCAGAGCAGGAAGCA         | Chr1:30336050-30952188   |
| 70653-1-F | GCTGTGGACCTTGCCAAGTT          | Chr4:80103729-80207060   |
| 70653-1-R | TGCAGTGCCAACCACAGTTT          | Chr4:80103729-80207060   |
| 70653-2-F | TGCACACAGGCATACAATTCC         | Chr4:80103729-80207060   |
| 70653-2-R | GTGAAAGAGGCACAAAAGAAATTGA     | Chr4:80103729-80207060   |
| 70653-3-F | CCATGTGAGGCATGGCTCTT          | Chr4:80103729-80207060   |
| 70653-3-R | CCTGCGTGCCCTGAATATCT          | Chr4:80103729-80207060   |
| 74073-1-F | GGCTGCTTCAGGTTTTAGAACAA       | Chr3:17342361-17710957   |
| 74073-1-R | CCTTGCCTCACTCCTTTTTCA         | Chr3:17342361-17710957   |
| 74073-2-F | CCCCTACATCCACACAATCACA        | Chr3:17342361-17710957   |
| 74073-2-R | TCTGCTTATATTGTTTTAGCCACAATTC  | Chr3:17342361-17710957   |
| 74073-3-F | TTAGAGTATTTTTGTCACAACGAAGGA   | Chr3:17342361-17710957   |
| 74073-3-R | CAGCATTGTTAGTGATCAAAGACACA    | Chr3:17342361-17710957   |
| 85245-1-F | GGGTGAGACAGTCTCTGCCATT        | Chr5:99501600-99810104   |
| 85245-1-R | ATCTGGTGGCCTTTGGAACCTT        | Chr5:99501600-99810104   |
| 85245-2-F | CATCATCAGGCCGAGGAAA           | Chr5:99501600-99810104   |
| 85245-2-R | ACTTAGTCCCATGTGAGCTTTAATTAGA  | Chr5:99501600-99810104   |
| 85245-3-F | CACAGATTACATCCGAGTCCTTTTCT    | Chr5:99501600-99810104   |
| 85245-3-R | CCAGGTGCTGGAATGTCATTG         | Chr5:99501600-99810104   |
| 87920-1-F | GCTGCGGTTCCACATTGAA           | Chr10:10058972-10215130  |
| 87920-1-R | CCCTTTGCCCTGTTTCTC            | Chr10:10058972-10215130  |
| 87920-2-F | GCCAGTTGCACCAAACGATA          | Chr10:10058972-10215130  |
| 87920-2-R | GCTCATACAAGCCAGTAGCTGAAG      | Chr10:10058972-10215130  |
| 87920-3-F | AACTCCTTGGGTTGGAGAACAG        | Chr10:10058972-10215130  |
| 87920-3-R | TCACCAGCAGTTCAGTGTTTTGT       | Chr10:10058972-10215130  |
| 89437-1-F | AGGGCTGGAACACCTCTTATGA        | Chr1:14341488-14762438   |
| 89437-1-R | TCGCAGCAAACATTATCAATGG        | Chr1:14341488-14762438   |
| 89437-2-F | GCTGTCTGGGTGGCAGAAAT          | Chr1:14341488-14762438   |
| 89437-2-R | CTGGCATTGAGCGAGGAAA           | Chr1:14341488-14762438   |
| 89437-3-F | GGTAGAGGAGGGCTTCTCGAA         | Chr1:14341488-14762438   |
| 89437-3-R | CCTCGATGCATTTTGCATCA          | Chr1:14341488-14762438   |
| 89844-1-F | CACAGAGGAAACAATCCACATCTC      | Chr3:7611612-7733107     |

|                |                                |                         |
|----------------|--------------------------------|-------------------------|
| 89844-1-R      | AAGTAGTCGCTGATGCTGAAAGC        | Chr3:7611612-7733107    |
| 89844--2-F     | GCCTAGGAAAAGAAAAGCCAATTT       | Chr3:7611612-7733107    |
| 89844--2-R     | TGCAACAATACTCAGGTCATCATTT      | Chr3:7611612-7733107    |
| 89844--3-F     | GGCAATTTTAAGCTTTTTGGAAC        | Chr3:7611612-7733107    |
| 89844--3-R     | ACACATTGAATGTTAAAGAGGGAGAGT    | Chr3:7611612-7733107    |
| 97196-1-F      | CACAGGTTTTCTCAATTAACCCATATT    | Chr2:17019985-17226171  |
| 97196-1-R      | CAAGTGCCCTTAAGTGGCAAA          | Chr2:17019985-17226171  |
| 97196-2-F      | ACCGCACACCACCTGTATCA           | Chr2:17019985-17226171  |
| 97196-2-R      | TCTGAGTTAGAGTTGCTGAAAACCA      | Chr2:17019985-17226171  |
| 97196-3-F      | GGTTAACCTGAAGGAAGGACAT         | Chr2:17019985-17226171  |
| 97196-3-R      | TCAACTGTCGTCATCATAATATACA      | Chr2:17019985-17226171  |
| 97271-1-F      | TTTTCTTTAGTTGCCCAAGCA          | Chr15:95135953-95889109 |
| 97271-1-R      | GGCTGTGAATGCAGGAATGA           | Chr15:95135953-95889109 |
| 97271-2-F      | GTTGTTTCATGGAGAGGAGCATT        | Chr15:95135953-95889109 |
| 97271-2-R      | CTTGCTGCAAACCACATAATCTATG      | Chr15:95135953-95889109 |
| 97271-3-F      | GCTGGCCCACTGCCAGTA             | Chr15:95135953-95889109 |
| 97271-3-R      | ATTCTGAAAAAATGACACTGTATCTAGTAG | Chr15:95135953-95889109 |
| Hoxa7_primer-F | AACGCTGCACTTTTGCCATT           | Endogenous Control      |
| Hoxa7_primer-R | GGGAAGAGTCGCCCACTTG            |                         |

\* F indicates the forward primer and R means the reverse primer. For example, 11950-1-F and 11950-1-R are a pair of primers.

### Quantitative Real-Time PCR

The quantitative real-time PCR was performed using the ABI Prism™ 7900HT Sequence Detection System and ABI Prism™ 384-well Clear Optical Reaction Plates. Each locus was amplified individually in a total volume of 10 µl, which contained 300 nM of each primer, 5 µl of ABI POWER SYBR Green Master Mix and 4 µl of DNA dilution. All the amplifications used in the same conditions: 95°C for 10 min, and 40 cycles of 95°C for 15 sec and 60°C for 1 min. Amplification was followed by a melting curve analysis starting from 60°C to 95°C at a linear rate of 0.1°C/sec to exclude the presence of unspecific products. The amplification data were analyzed using SDS software (version 2.1, Applied Biosystems).

### Supplementary Table 2. Singleton Deletions Identified in This Study.

| Chr | Start     | End       | Phenotype<br>(1=control,<br>2 = case) |
|-----|-----------|-----------|---------------------------------------|
| 1   | 112987422 | 113369070 | 1                                     |
| 1   | 113388739 | 114043773 | 1                                     |
| 1   | 114105331 | 114260861 | 1                                     |
| 1   | 114379103 | 114611497 | 1                                     |
| 1   | 114627212 | 115118807 | 1                                     |
| 1   | 214001144 | 214182688 | 1                                     |
| 1   | 246404335 | 246667943 | 1                                     |

| Chr | Start     | End       | Phenotype<br>(1=control,<br>2 = case) |
|-----|-----------|-----------|---------------------------------------|
| 1   | 179082079 | 179207535 | 1                                     |
| 1   | 239069843 | 239226340 | 1                                     |
| 1   | 100964950 | 101093664 | 1                                     |
| 1   | 696962    | 803181    | 1                                     |
| 1   | 14341488  | 14762438  | 2                                     |
| 1   | 30336050  | 30952188  | 2                                     |
| 1   | 62052182  | 62289893  | 2                                     |
| 1   | 85996510  | 86164671  | 2                                     |
| 1   | 247034191 | 247138092 | 2                                     |
| 1   | 144093481 | 144503421 | 2                                     |
| 1   | 59854502  | 60323099  | 2                                     |
| 1   | 111824223 | 111936532 | 1                                     |
| 2   | 194335159 | 194473802 | 1                                     |
| 2   | 87214683  | 87326171  | 1                                     |
| 2   | 110061321 | 110173878 | 1                                     |
| 2   | 41648921  | 41782840  | 1                                     |
| 2   | 117685550 | 117846661 | 1                                     |
| 2   | 117965258 | 118115612 | 1                                     |
| 2   | 194024309 | 194135536 | 1                                     |
| 2   | 141557011 | 141854532 | 1                                     |
| 2   | 78078191  | 78417836  | 1                                     |
| 2   | 50830356  | 50939853  | 2                                     |
| 2   | 211338224 | 211945208 | 2                                     |
| 2   | 187739868 | 188037266 | 2                                     |
| 2   | 134279946 | 134607843 | 2                                     |
| 2   | 81245677  | 81345716  | 2                                     |
| 2   | 51052476  | 51182653  | 2                                     |
| 2   | 17019985  | 17226171  | 2                                     |
| 2   | 31581547  | 31691315  | 2                                     |
| 2   | 82866310  | 83147178  | 2                                     |
| 2   | 179017997 | 179222014 | 2                                     |
| 2   | 43681325  | 43834135  | 2                                     |
| 2   | 130580429 | 130874329 | 2                                     |
| 2   | 133734967 | 133872725 | 2                                     |
| 2   | 2784      | 364086    | 2                                     |
| 2   | 52139472  | 52253660  | 2                                     |
| 2   | 135582431 | 136001762 | 2                                     |
| 2   | 209513906 | 209750829 | 2                                     |
| 2   | 138876258 | 138999006 | 2                                     |
| 2   | 193305544 | 193473630 | 2                                     |

| Chr | Start     | End       | Phenotype<br>(1=control,<br>2 = case) |
|-----|-----------|-----------|---------------------------------------|
| 2   | 57451768  | 57574406  | 2                                     |
| 2   | 51223965  | 51364053  | 1                                     |
| 2   | 51949825  | 52117047  | 1                                     |
| 2   | 153261397 | 153446144 | 1                                     |
| 2   | 77117777  | 77266367  | 1                                     |
| 2   | 52266990  | 52437594  | 2                                     |
| 2   | 138413047 | 138516208 | 2                                     |
| 2   | 122393161 | 122819888 | 1                                     |
| 2   | 117217972 | 117452675 | 1                                     |
| 3   | 2650155   | 3025952   | 1                                     |
| 3   | 192767319 | 192984913 | 1                                     |
| 3   | 89638717  | 90070475  | 1                                     |
| 3   | 165298261 | 165401615 | 1                                     |
| 3   | 13944582  | 14068739  | 1                                     |
| 3   | 107316477 | 107685603 | 2                                     |
| 3   | 65647659  | 65852131  | 2                                     |
| 3   | 22215863  | 22347752  | 2                                     |
| 3   | 105569731 | 105752712 | 2                                     |
| 3   | 17342361  | 17710957  | 2                                     |
| 3   | 145439120 | 145710806 | 2                                     |
| 3   | 18981260  | 19131053  | 2                                     |
| 3   | 9935293   | 10196986  | 2                                     |
| 3   | 181297216 | 181468866 | 2                                     |
| 3   | 832458    | 1403398   | 2                                     |
| 3   | 167146025 | 167290266 | 2                                     |
| 3   | 7611612   | 7733107   | 2                                     |
| 3   | 96172820  | 96286311  | 2                                     |
| 3   | 20364761  | 20467460  | 1                                     |
| 3   | 8356115   | 8625632   | 1                                     |
| 3   | 118264707 | 118416541 | 1                                     |
| 3   | 35225818  | 35409506  | 1                                     |
| 3   | 101143456 | 101386471 | 1                                     |
| 3   | 120342178 | 120478373 | 1                                     |
| 3   | 60945848  | 61106220  | 1                                     |
| 4   | 29104176  | 29217491  | 1                                     |
| 4   | 93499105  | 93648445  | 1                                     |
| 4   | 117291716 | 118395629 | 1                                     |
| 4   | 112922084 | 113764131 | 1                                     |
| 4   | 80103729  | 80207060  | 1                                     |
| 4   | 99017017  | 99146601  | 1                                     |

| Chr | Start     | End       | Phenotype<br>(1=control,<br>2 = case) |
|-----|-----------|-----------|---------------------------------------|
| 4   | 180005002 | 180169855 | 1                                     |
| 4   | 133789062 | 133911766 | 2                                     |
| 4   | 98207371  | 98370821  | 2                                     |
| 4   | 189737452 | 190802642 | 2                                     |
| 4   | 190922957 | 191140365 | 2                                     |
| 4   | 181983992 | 182237242 | 2                                     |
| 4   | 128329186 | 128541282 | 2                                     |
| 4   | 100416318 | 100528007 | 2                                     |
| 4   | 188718084 | 189093837 | 2                                     |
| 4   | 9088444   | 9243088   | 2                                     |
| 4   | 79275401  | 79382547  | 2                                     |
| 4   | 131746385 | 131852628 | 2                                     |
| 4   | 133983530 | 134242899 | 2                                     |
| 4   | 181669986 | 181822346 | 1                                     |
| 4   | 58530285  | 58727740  | 1                                     |
| 5   | 110337010 | 110448344 | 1                                     |
| 5   | 160545244 | 161037282 | 1                                     |
| 5   | 99501600  | 99810104  | 1                                     |
| 5   | 19906605  | 20606744  | 1                                     |
| 5   | 46025150  | 46231639  | 2                                     |
| 5   | 46235193  | 46425030  | 2                                     |
| 5   | 17698274  | 17830332  | 2                                     |
| 5   | 117133409 | 117416984 | 2                                     |
| 5   | 117432239 | 117538631 | 2                                     |
| 5   | 12452671  | 12963368  | 2                                     |
| 5   | 25121394  | 25414219  | 2                                     |
| 5   | 68532     | 214394    | 2                                     |
| 5   | 101026885 | 101313281 | 2                                     |
| 5   | 96565280  | 96666521  | 2                                     |
| 5   | 165026670 | 165342653 | 2                                     |
| 5   | 28971964  | 29184630  | 2                                     |
| 5   | 28549024  | 28718875  | 2                                     |
| 5   | 129367156 | 129884973 | 1                                     |
| 5   | 59677588  | 60022604  | 1                                     |
| 6   | 5267637   | 5369510   | 1                                     |
| 6   | 27870166  | 28498379  | 1                                     |
| 6   | 151340020 | 151472562 | 1                                     |
| 6   | 45013269  | 45349965  | 1                                     |
| 6   | 93159029  | 93282768  | 1                                     |
| 6   | 162035802 | 162238195 | 1                                     |

| Chr | Start     | End       | Phenotype<br>(1=control,<br>2 = case) |
|-----|-----------|-----------|---------------------------------------|
| 6   | 107598945 | 107772723 | 1                                     |
| 6   | 8537498   | 8664123   | 1                                     |
| 6   | 65788287  | 65908614  | 2                                     |
| 6   | 162297547 | 162466706 | 2                                     |
| 6   | 65913525  | 66058470  | 2                                     |
| 6   | 20860023  | 21094979  | 2                                     |
| 6   | 66450069  | 66568114  | 2                                     |
| 6   | 162768919 | 162951431 | 2                                     |
| 6   | 104923619 | 105082413 | 2                                     |
| 6   | 110341005 | 110496619 | 2                                     |
| 6   | 64845289  | 64981515  | 2                                     |
| 6   | 104282675 | 104588821 | 1                                     |
| 6   | 41949777  | 42425545  | 1                                     |
| 6   | 27591795  | 27719987  | 1                                     |
| 6   | 119101408 | 119211399 | 1                                     |
| 7   | 63163680  | 63422330  | 1                                     |
| 7   | 10490955  | 10631135  | 1                                     |
| 7   | 83834194  | 84122855  | 1                                     |
| 7   | 13830534  | 13987646  | 1                                     |
| 7   | 56361154  | 56482133  | 1                                     |
| 7   | 56511423  | 56651425  | 1                                     |
| 7   | 56736309  | 57221738  | 1                                     |
| 7   | 29637243  | 29747478  | 1                                     |
| 7   | 152525686 | 152731588 | 1                                     |
| 7   | 66118518  | 66230195  | 1                                     |
| 7   | 87503175  | 87628645  | 2                                     |
| 7   | 146619135 | 146732506 | 1                                     |
| 7   | 12234020  | 12334355  | 2                                     |
| 7   | 80252572  | 80393232  | 2                                     |
| 7   | 18172304  | 18354493  | 2                                     |
| 7   | 16816511  | 16974692  | 2                                     |
| 7   | 15093427  | 15230116  | 2                                     |
| 7   | 110030843 | 110177415 | 2                                     |
| 7   | 117711123 | 117812999 | 2                                     |
| 7   | 983474    | 1083962   | 2                                     |
| 7   | 51636486  | 51869014  | 2                                     |
| 7   | 89394963  | 89549758  | 1                                     |
| 7   | 1463147   | 1727907   | 1                                     |
| 7   | 5023605   | 5149325   | 1                                     |
| 7   | 102273590 | 102493457 | 1                                     |



| Chr | Start     | End       | Phenotype<br>(1=control,<br>2 = case) |
|-----|-----------|-----------|---------------------------------------|
| 8   | 8577248   | 8764567   | 1                                     |
| 8   | 89910306  | 90021039  | 1                                     |
| 8   | 90544322  | 90678285  | 1                                     |
| 8   | 17649519  | 17813473  | 1                                     |
| 8   | 9835494   | 9942198   | 1                                     |
| 8   | 89714774  | 89872504  | 2                                     |
| 8   | 115818013 | 115979174 | 2                                     |
| 8   | 112404217 | 112532873 | 2                                     |
| 8   | 33984545  | 34181218  | 2                                     |
| 8   | 62198081  | 62342696  | 2                                     |
| 8   | 13594555  | 13803591  | 2                                     |
| 8   | 127289895 | 127420529 | 2                                     |
| 8   | 57757261  | 58123374  | 1                                     |
| 9   | 107239010 | 107340007 | 1                                     |
| 9   | 107575646 | 107771176 | 1                                     |
| 9   | 7776145   | 7894651   | 1                                     |
| 9   | 103893182 | 104086715 | 1                                     |
| 9   | 25280188  | 25771446  | 1                                     |
| 9   | 84001758  | 84203153  | 2                                     |
| 9   | 118479893 | 118601081 | 2                                     |
| 9   | 30879485  | 30987350  | 2                                     |
| 9   | 12770295  | 12899312  | 2                                     |
| 9   | 9837864   | 9971069   | 2                                     |
| 9   | 10745356  | 11271192  | 2                                     |
| 9   | 1320599   | 1465882   | 2                                     |
| 9   | 5209901   | 5375778   | 2                                     |
| 9   | 8005209   | 8106186   | 2                                     |
| 9   | 108094238 | 108218479 | 1                                     |
| 9   | 118293597 | 118397730 | 1                                     |
| 9   | 287878    | 400370    | 1                                     |
| 10  | 128361479 | 128559816 | 1                                     |
| 10  | 10058972  | 10215130  | 2                                     |
| 10  | 111195021 | 111323778 | 2                                     |
| 10  | 56148428  | 56359760  | 2                                     |
| 10  | 32899498  | 33000799  | 2                                     |
| 10  | 37554667  | 37710375  | 2                                     |
| 10  | 90344868  | 90556337  | 1                                     |
| 10  | 90559662  | 90957411  | 1                                     |
| 11  | 26949271  | 27197653  | 1                                     |
| 11  | 81327836  | 81464615  | 1                                     |

| Chr | Start     | End       | Phenotype<br>(1=control,<br>2 = case) |
|-----|-----------|-----------|---------------------------------------|
| 11  | 114721884 | 114868905 | 1                                     |
| 11  | 131159857 | 131261275 | 1                                     |
| 11  | 50424537  | 50546653  | 1                                     |
| 11  | 4760556   | 4866960   | 1                                     |
| 11  | 39882026  | 40007110  | 1                                     |
| 11  | 31510470  | 31740158  | 2                                     |
| 11  | 132518807 | 132864395 | 2                                     |
| 11  | 38893850  | 39061298  | 2                                     |
| 11  | 36668226  | 36773732  | 2                                     |
| 11  | 28011741  | 28338552  | 2                                     |
| 11  | 25250128  | 26084796  | 2                                     |
| 11  | 93615588  | 93718931  | 2                                     |
| 11  | 102652001 | 102778728 | 2                                     |
| 11  | 4481014   | 4590667   | 2                                     |
| 11  | 7551379   | 7741499   | 2                                     |
| 11  | 5541538   | 5722264   | 2                                     |
| 11  | 96315312  | 96464735  | 1                                     |
| 11  | 133786141 | 134449982 | 1                                     |
| 12  | 5106123   | 5264317   | 1                                     |
| 12  | 42738391  | 42871809  | 1                                     |
| 12  | 85728483  | 86139645  | 1                                     |
| 12  | 69556712  | 69659898  | 1                                     |
| 12  | 11055369  | 11171582  | 2                                     |
| 12  | 81739512  | 81882550  | 2                                     |
| 12  | 125358126 | 126141645 | 2                                     |
| 12  | 130388049 | 130664946 | 2                                     |
| 12  | 33548635  | 33727028  | 1                                     |
| 13  | 66110636  | 66297368  | 1                                     |
| 13  | 99707290  | 99841672  | 1                                     |
| 13  | 54419445  | 54552662  | 1                                     |
| 13  | 63303324  | 63835483  | 2                                     |
| 13  | 66506774  | 66679448  | 2                                     |
| 13  | 68562415  | 68756637  | 2                                     |
| 13  | 19695328  | 20002424  | 2                                     |
| 13  | 86484088  | 86607162  | 2                                     |
| 13  | 69735960  | 69875736  | 2                                     |
| 13  | 86002839  | 86118457  | 2                                     |
| 13  | 104327533 | 104693653 | 2                                     |
| 13  | 67078117  | 67195263  | 2                                     |
| 13  | 41305653  | 41475788  | 1                                     |

| Chr | Start     | End       | Phenotype<br>(1=control,<br>2 = case) |
|-----|-----------|-----------|---------------------------------------|
| 14  | 85746169  | 85907603  | 2                                     |
| 14  | 38180299  | 38387234  | 2                                     |
| 14  | 45561879  | 45874496  | 2                                     |
| 14  | 41634412  | 42844607  | 2                                     |
| 14  | 48132582  | 48260726  | 2                                     |
| 14  | 65606389  | 65762067  | 2                                     |
| 14  | 86185554  | 86334317  | 2                                     |
| 14  | 26589758  | 26862564  | 1                                     |
| 15  | 50759751  | 50950209  | 1                                     |
| 15  | 34140057  | 34272543  | 1                                     |
| 15  | 98203369  | 98317280  | 1                                     |
| 15  | 95135953  | 95889109  | 1                                     |
| 15  | 43934925  | 44070720  | 2                                     |
| 15  | 44460444  | 44629062  | 2                                     |
| 15  | 100122652 | 100286563 | 2                                     |
| 15  | 60948591  | 61059666  | 2                                     |
| 15  | 91468546  | 91686822  | 2                                     |
| 15  | 73848212  | 74678295  | 2                                     |
| 15  | 74682831  | 76002735  | 2                                     |
| 15  | 85865979  | 86171624  | 1                                     |
| 15  | 68562262  | 68662843  | 1                                     |
| 16  | 81109185  | 81240041  | 1                                     |
| 16  | 70938484  | 71171821  | 1                                     |
| 16  | 75500301  | 75644624  | 2                                     |
| 16  | 45780566  | 46216218  | 2                                     |
| 16  | 77497019  | 77634452  | 2                                     |
| 16  | 6334356   | 6573261   | 2                                     |
| 16  | 34054852  | 34162068  | 2                                     |
| 16  | 78768757  | 78894217  | 2                                     |
| 16  | 77200307  | 77342789  | 2                                     |
| 16  | 88616964  | 88815036  | 2                                     |
| 16  | 3377269   | 3599472   | 2                                     |
| 16  | 29425212  | 30099408  | 1                                     |
| 17  | 63489383  | 63696899  | 2                                     |
| 17  | 14034987  | 15425596  | 2                                     |
| 17  | 10192755  | 10302402  | 2                                     |
| 17  | 48308592  | 48669406  | 2                                     |
| 17  | 19363885  | 19524790  | 2                                     |
| 17  | 3339284   | 3580845   | 1                                     |
| 17  | 49284284  | 49458197  | 1                                     |

| Chr | Start    | End      | Phenotype<br>(1=control,<br>2 = case) |
|-----|----------|----------|---------------------------------------|
| 17  | 22997431 | 23100753 | 1                                     |
| 17  | 346628   | 469478   | 2                                     |
| 18  | 18586267 | 18717349 | 1                                     |
| 18  | 65736224 | 65871226 | 2                                     |
| 18  | 63759585 | 63934609 | 2                                     |
| 18  | 13772867 | 13916665 | 2                                     |
| 18  | 55816000 | 56063854 | 2                                     |
| 19  | 22926249 | 23090115 | 1                                     |
| 19  | 13585920 | 13751837 | 2                                     |
| 19  | 20114007 | 20272000 | 2                                     |
| 20  | 53236812 | 53448810 | 1                                     |
| 20  | 23423221 | 23551527 | 2                                     |
| 20  | 8124269  | 8230686  | 2                                     |
| 20  | 61947003 | 62426597 | 1                                     |
| 21  | 22332016 | 22535203 | 1                                     |
| 21  | 45957636 | 46066684 | 2                                     |
| 21  | 36039929 | 36180839 | 2                                     |
| 21  | 26179419 | 26309441 | 2                                     |
| 22  | 17386126 | 18691917 | 2                                     |
| 22  | 19046936 | 19795835 | 2                                     |
| 22  | 32209002 | 32482148 | 2                                     |
| 22  | 24248713 | 24457052 | 1                                     |
| 23  | 1415800  | 1663566  | 2                                     |

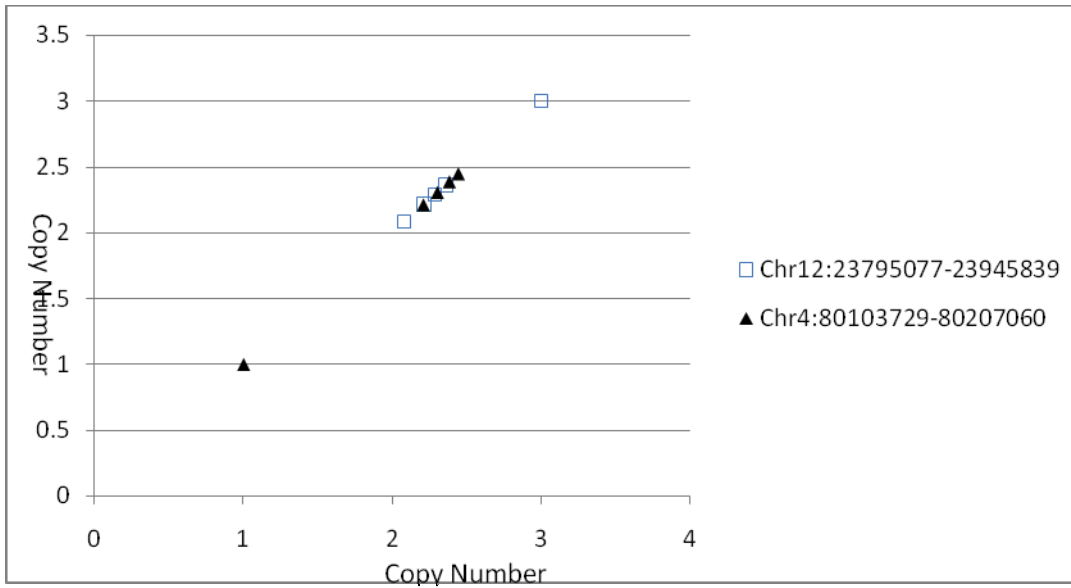

Supp Figure 1. Validation of one singleton deletion region (one copy) and one singleton duplication (3 copies) region by qPCR. For each region, five samples were tested (one carried CNV, the others had 2 copies). The results were consistent with the identifications from Birdsuite. For Chr4:80103729-80207060, one sample possessed the deletion and the other 4 samples had two copies; For Chr12:23795077-23945839, one sample carried 3 copies, the others had two copies.
